# Supplementary material for: GmTCP40 Promotes Soybean Flowering under Long-Day Conditions by Binding to the GmAP1a Promoter and Upregulating Its Expression
Source: MDPI journal article supplement (doi:10.3390/biom14040465), 2024-04-10
Supplement: s1 [file s1]

## **Supplementary Materials**

Supplementary Methods

Supplementary Figure S1

Supplementary Figure S2

Supplementary Figure S3

Supplementary Figure S4

Supplementary Table S1

Supplementary Table S2

Supplementary Table S3

Supplementary Table S4

Supplementary Table S5

### Supplementary Methods

Protocol for transformation of the recombinant vector into *Agrobacterium tumefaciens*

EHA101/GV3101/EHA105/EHA105 (pSoup):

Thaw the chemically competent cells on ice.

Gently mix the thawed cells with the recombinant vector using a pipette.

Sequentially incubate the mixture on ice for 10 min, in liquid nitrogen for 5 min, in a 37°C water bath for 30 s, and on ice for another 10 min.

Add 700 µL of antibiotic-free Luria-Bertani (LB) liquid medium to the mixture and shake the culture at 28°C for 2–3 h.

Centrifuge the culture at 6000 rpm for 1 min to pellet the bacteria.

Retain about 100 µL of the supernatant and use it to gently resuspend the bacterial pellet.

Spread the resuspended bacterial cells onto LB agar plates containing the appropriate antibiotic.

Invert the plates and incubate at 28°C for 2–3 days.

Protocol for transformation into the yeast strain EGY48:

Thaw 100 µL of EGY48 competent cells on ice.

Add pre-chilled plasmids to the cells, followed by 10 µL Carrier DNA. Heat the mixture at 95–100°C for 5 min, then place in an ice bath.

Repeat the heating and chilling steps once then add 500 µL of PEG/LiAc and gently mix by pipetting.

Incubate the mixture in a water bath at 30°C for 30 min (inverting the tube 6–8 times every 15 min).

Place the tube in a 42 °C water bath for 15 min (inverting 6–8 times every 7.5 min).

Centrifuge at 5000 rpm for 40 s and discard the supernatant.

Resuspend the cells in 400 µL of ddH<sub>2</sub>O and centrifuge for 30 s before discarding the supernatant.

Resuspend the cells in 50 µL of ddH<sub>2</sub>O, spread onto SD/-Trp/-Ura plates, and incubate at 30°C for 3–5 days.

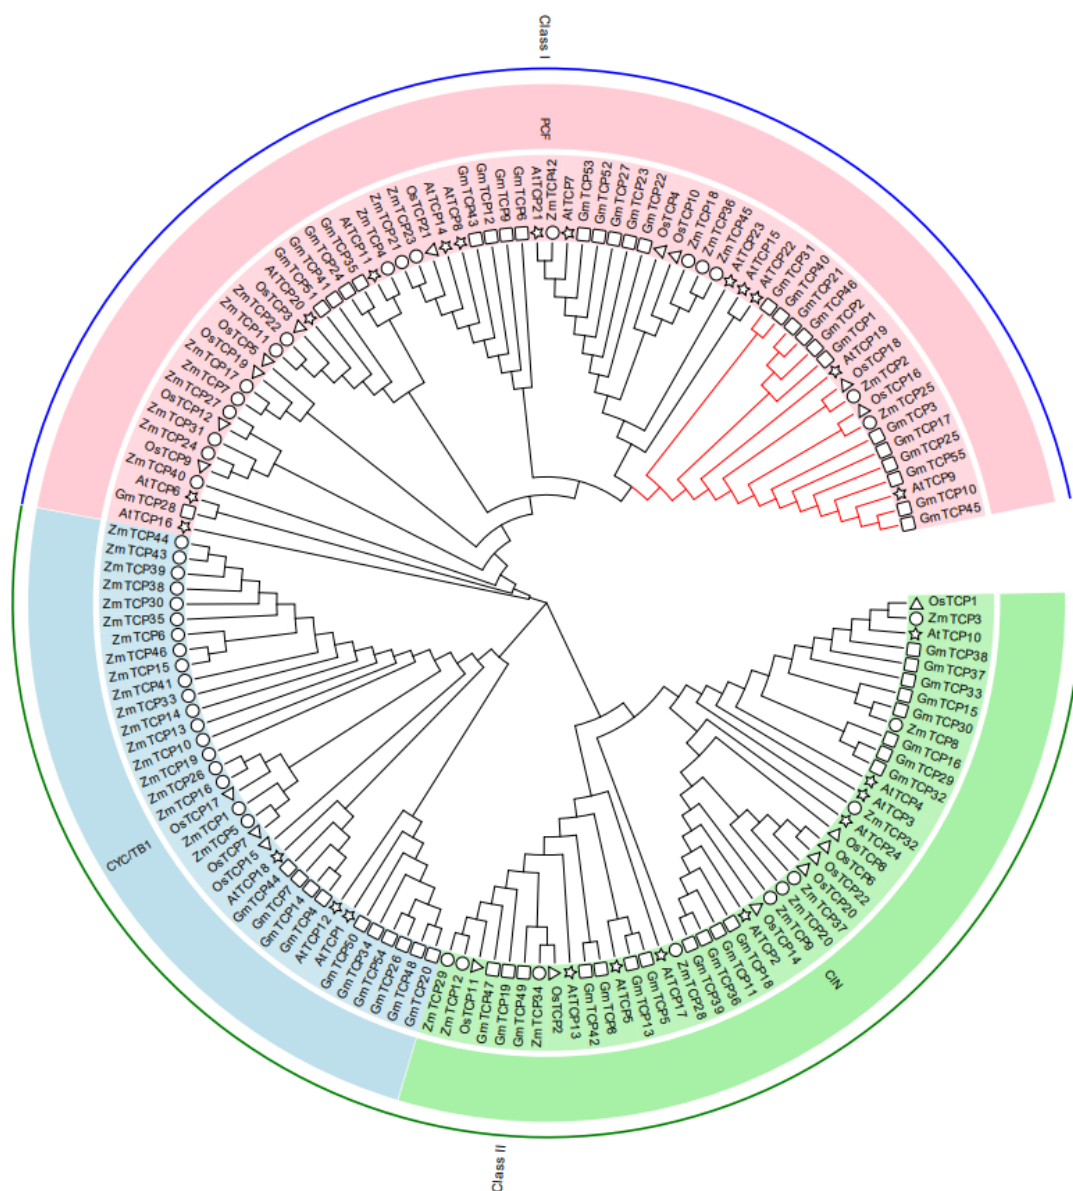

**Supplementary Figure S1. Phylogenetic analysis of TCP homologs from four different plant species.** Phylogenetic relationships of the TCP proteins from *Arabidopsis thaliana*, *Oryza sativa*, *Zea mays*, and *Glycine max*. The phylogenetic tree was constructed using the neighbor-joining (NJ) method with a bootstrap value of 1000 in MEGA 7 software. The red branch signifies the specific location of GmTCP40 within the branch.

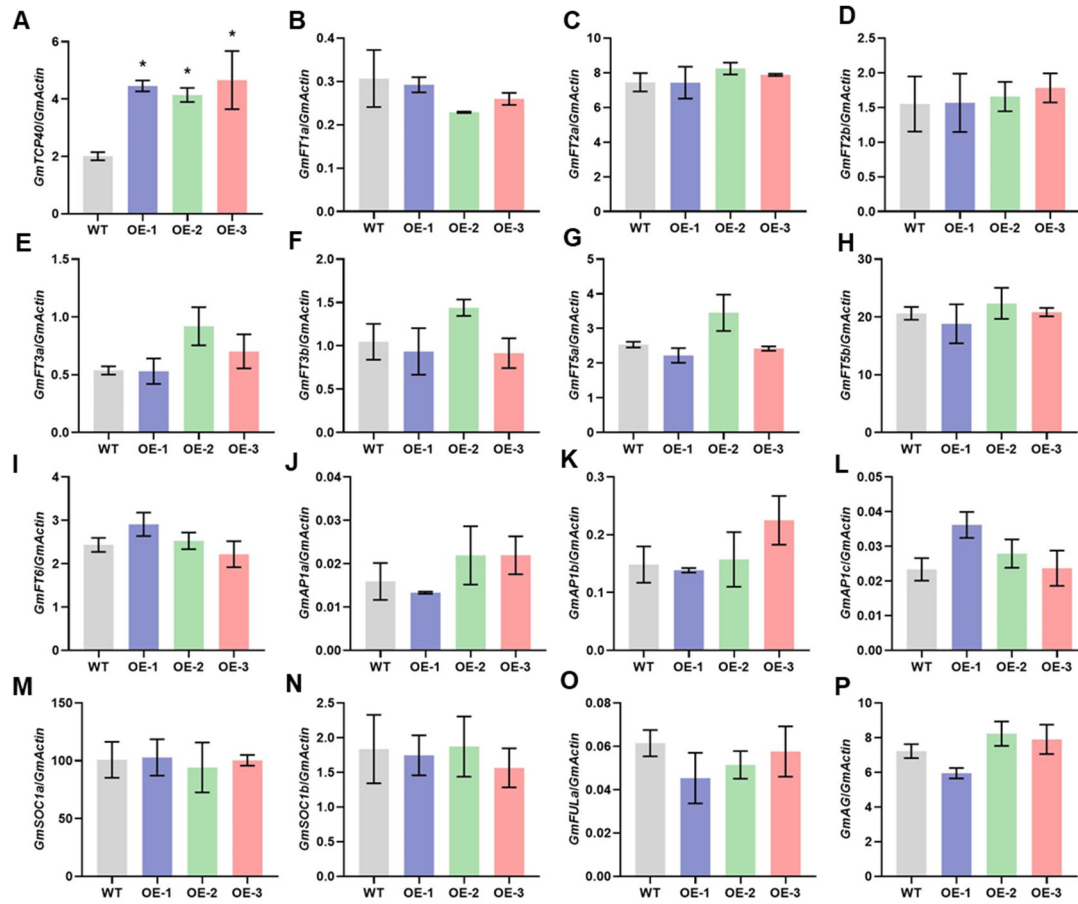

**Supplementary Figure S2. Expression levels of flowering-related genes in WT plants and *GmTCP40*-OE transgenic lines under short-day conditions (A-P).** The leaves of three *GmTCP40* overexpression lines (OE-1, OE-2, and OE-3) and wild type (WT) plants under short-day (SD) (12 h light/12 h dark) conditions were harvested for qRT-PCR analysis of the expression levels of *GmTCP40* (A), *GmFT1a* (B), *GmFT2a* (C), *GmFT2b* (D), *GmFT3a* (E), *GmFT3b* (F), *GmFT5a* (G), *GmFT5b* (H), *GmFT6* (I), *GmAP1a* (J), *GmAP1b* (K), *GmAP1c* (L), *GmSOC1a* (M), *GmSOC1b* (N), *GmFULa* (O), and *GmAG* (P). The relative expression level was normalized to that of *GmActin*. The data are presented as means  $\pm$  SD of three replicates (\* $p < 0.05$ ).

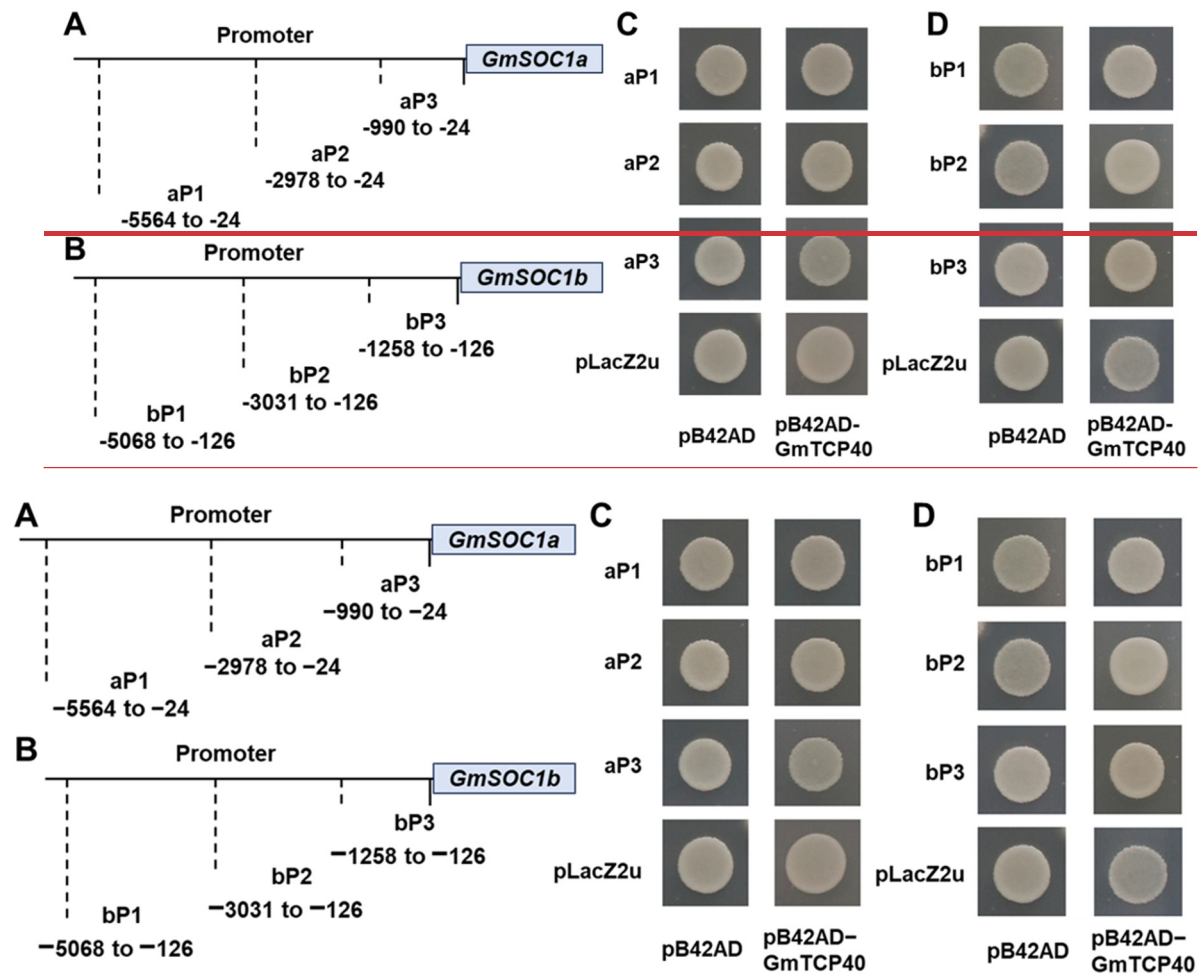

**Supplementary Figure S3. GmTCP40 does not bind to promoters of *GmSOC1a* and *GmSOC1b*.** (A-B) 3 fragments of the promoter of *GmSOC1a* and *GmSOC1b* were subcloned into pLacZ2u vector, respectively. (C-D) The interaction between GmTCP40 and the *GmSOC1a* and *GmSOC1b* promoter was examined by yeast one-hybrid (Y1H) assay. The transformants were assessed on SD/-Trp/-Ura media supplemented with 20 mM X-gal, Galactose (Gal), and Raffinose (Raf). Empty vectors served as the negative controls.

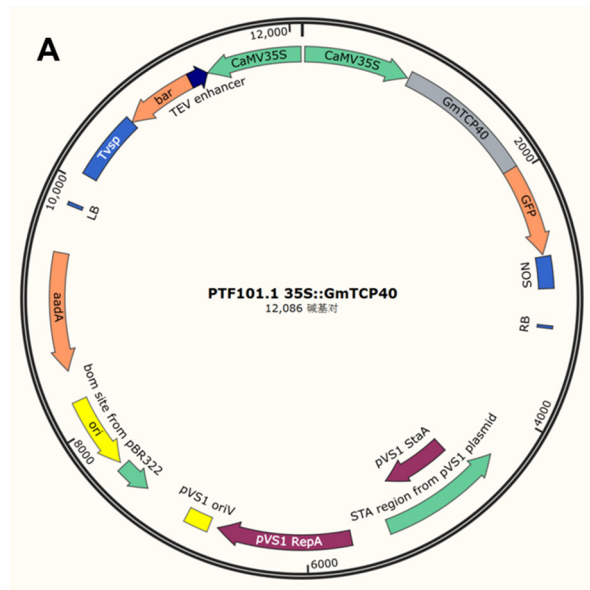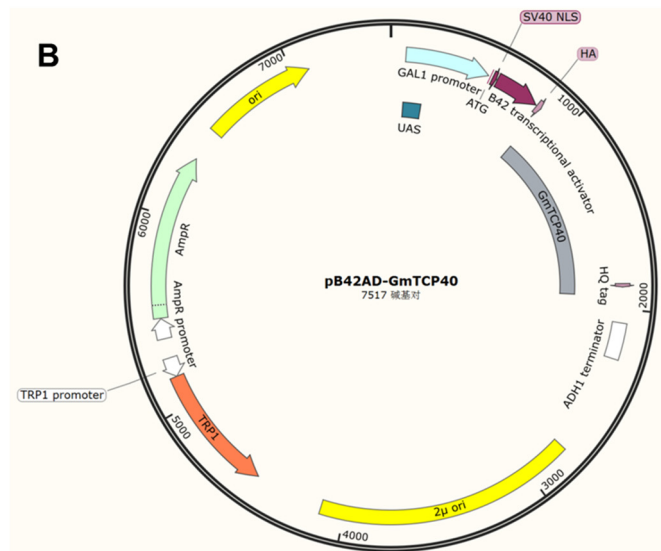

**Supplementary Figure S4. Diagrams of pTF101-*GmTCP40* and pB42AD-*GmTCP40* vector. (A) A diagram of the Vector pTF101-*GmTCP40*. (B) A diagram of the Vector pB42AD-*GmTCP40*.**

**Supplementary Table S1.** Source information of 175 re-sequenced soybean varieties.

| Variety         | Region | Province       | Variety          | Region | Province       |
|-----------------|--------|----------------|------------------|--------|----------------|
| Beihudou        | NE     | Heilongjiang   | Fushou           | NE     | Inner Mongolia |
| Beifeng2        | NE     | Heilongjiang   | Jilin4           | NE     | Jilin          |
| Beifeng9        | NE     | Heilongjiang   | Changnong4       | NE     | Jilin          |
| Beifeng11       | NE     | Heilongjiang   | Zhi2             | NE     | Jilin          |
| Beidou5         | NE     | Heilongjiang   | Changnong5       | NE     | Jilin          |
| Dengke1         | NE     | Heilongjiang   | Fengdihuang      | NE     | Jilin          |
| Dongnong4       | NE     | Heilongjiang   | Huangbaozhu      | NE     | Jilin          |
| Dongnong72-806  | NE     | Heilongjiang   | Jilin3           | NE     | Jilin          |
| Fengshou10      | NE     | Heilongjiang   | Jilin6           | NE     | Jilin          |
| Suinong14       | NE     | Heilongjiang   | Jilin13          | NE     | Jilin          |
| Fengshou17      | NE     | Heilongjiang   | Jilin20          | NE     | Jilin          |
| Fengshou19      | NE     | Heilongjiang   | Jilin30          | NE     | Jilin          |
| Fengshou24      | NE     | Heilongjiang   | Jilin47          | NE     | Jilin          |
| Hefeng25        | NE     | Heilongjiang   | Jiti5            | NE     | Jilin          |
| Hefeng35        | NE     | Heilongjiang   | Jiyu57           | NE     | Jilin          |
| Zihua4          | NE     | Heilongjiang   | Jiunong9         | NE     | Jilin          |
| Heihe9          | NE     | Heilongjiang   | Jiunong22        | NE     | Jilin          |
| Heihe18         | NE     | Heilongjiang   | Xiaojinhuang1    | NE     | Jilin          |
| Heihe19         | NE     | Heilongjiang   | Zaofeng1         | NE     | Jilin          |
| Heihe27         | NE     | Heilongjiang   | Jiti1            | NE     | Liaoning       |
| Heihe38         | NE     | Heilongjiang   | Jin6604-24       | NE     | Liaoning       |
| Heihe51         | NE     | Heilongjiang   | Kaiyu3           | NE     | Liaoning       |
| Heihe54         | NE     | Heilongjiang   | Kaiyu8           | NE     | Liaoning       |
| Heilongjiang41  | NE     | Heilongjiang   | Kaiyu10          | NE     | Liaoning       |
| Huajiang4       | NE     | Heilongjiang   | Tiefeng3         | NE     | Liaoning       |
| Jinyuan2        | NE     | Heilongjiang   | Tiefeng8         | NE     | Liaoning       |
| Jingshanpu      | NE     | Heilongjiang   | Tiefeng18        | NE     | Liaoning       |
| Kexi283         | NE     | Heilongjiang   | Tiefeng19        | NE     | Liaoning       |
| Kangxian4       | NE     | Heilongjiang   | Tiefeng20        | NE     | Liaoning       |
| Mancangjin      | NE     | Heilongjiang   | Dandou2          | NE     | Liaoning       |
| Suinong3        | NE     | Heilongjiang   | Dandou4          | NE     | Liaoning       |
| Suinong28       | NE     | Heilongjiang   | Jin8-14          | NE     | Liaoning       |
| Hejiao6         | NE     | Heilongjiang   | Jin33            | NE     | Liaoning       |
| Hejiao8         | NE     | Heilongjiang   | Liaodou15        | NE     | Liaoning       |
| Hefeng22        | NE     | Heilongjiang   | Tiefeng31        | NE     | Liaoning       |
| Hefeng45        | NE     | Heilongjiang   | Dandou1          | NE     | Liaoning       |
| Hefeng47        | NE     | Heilongjiang   | Tiefeng29        | NE     | Liaoning       |
| Hefeng50        | NE     | Heilongjiang   | Changpingqingdou | HHH    | Beijing        |
| Hefeng55        | NE     | Heilongjiang   | Jindou2          | HHH    | Shanxi         |
| Heinong16       | NE     | Heilongjiang   | Jindou3          | HHH    | Shanxi         |
| Heinong26       | NE     | Heilongjiang   | Jindou19         | HHH    | Shanxi         |
| Heinong33       | NE     | Heilongjiang   | Jindou21         | HHH    | Shanxi         |
| Heinong35       | NE     | Heilongjiang   | Jindou25         | HHH    | Shanxi         |
| Heinong37       | NE     | Heilongjiang   | Jindou1          | HHH    | Shanxi         |
| Heinong43       | NE     | Heilongjiang   | Hai94            | HHH    | Shanxi         |
| Heinong48       | NE     | Heilongjiang   | Kefeng6          | HHH    | Hebei          |
| Kenfeng16       | NE     | Heilongjiang   | Handou5          | HHH    | Hebei          |
| Suinong10       | NE     | Heilongjiang   | Jidou12          | HHH    | Hebei          |
| Miquanhuangdou  | NE     | Xinjiang       | Jidou17          | HHH    | Hebei          |
| Changjihuangdou | NE     | Xinjiang       | Zhongdou19       | HHH    | Hebei          |
| Mengdou30       | NE     | Inner Mongolia | Zhonghuang13     | HHH    | Hebei          |

| Variety                         | Region | Province | Variety            | Region | Province  |
|---------------------------------|--------|----------|--------------------|--------|-----------|
| Zhonghuang37                    | HHH    | Hebei    | Chenliuniumaohuang | SC     | Henan     |
| Naiyinheidou                    | HHH    | Hebei    | Suidaohuang        | SC     | Jiangsu   |
| Huairouhuangdou                 | HHH    | Beijing  | Nannong493-1       | SC     | Jiangsu   |
| Qunyingdou                      | HHH    | Hebei    | Taixingheidou      | SC     | Jiangsu   |
| Zhonghuang30                    | HHH    | Hebei    | Jinda332           | SC     | Jiangsu   |
| Zhonghuang35                    | HHH    | Hebei    | Edou8              | SC     | Hubei     |
| Bahong1                         | HHH    | Hebei    | Aijiaozao          | SC     | Hubei     |
| Youbian30                       | HHH    | Hebei    | Tianlong1          | SC     | Hubei     |
| Jidou7                          | HHH    | Hebei    | Edou2              | SC     | Hubei     |
| Hezeniumaohuang                 | HHH    | Shandong | Houzimao           | SC     | Hubei     |
| Ludou4                          | HHH    | Shandong | Xiangdou3          | SC     | Hunan     |
| Yanhuang1                       | HHH    | Shandong | Yunyizao           | SC     | Hunan     |
| Hedou13                         | HHH    | Shandong | Baishudou          | SC     | Hunan     |
| Fengshouhuang                   | HHH    | Shandong | Qiudou1            | SC     | Hunan     |
| Yidupingdinghuang               | HHH    | Shandong | Zigongqingpidou    | SC     | Sichuan   |
| Wenfeng5                        | HHH    | Shandong | Nandou12           | SC     | Sichuan   |
| Wenfeng7                        | HHH    | Shandong | Liuyuehuang        | SC     | Guizhou   |
| Ludou11                         | HHH    | Shandong | Qiantou6           | SC     | Guizhou   |
| Qihuang10                       | HHH    | Shandong | Shangyukanshanbai  | SC     | Zhejiang  |
| Haiyangpamanqing                | HHH    | Shandong | Zhechun3           | SC     | Zhejiang  |
| Yuejin4                         | HHH    | Shandong | Lanxidaqingdou     | SC     | Zhejiang  |
| Yuejin5                         | HHH    | Shandong | Jinjiangdaqingren  | SC     | Fujian    |
| Yudou2                          | HHH    | Henan    | Shangraodaqingsi   | SC     | Jiangxi   |
| Yudou8                          | HHH    | Henan    | Fengchengniupidou  | SC     | Jiangxi   |
| Yudou22                         | HHH    | Henan    | Dian86-4           | SC     | Yunnan    |
| Zheng92116                      | HHH    | Henan    | Jinningdahuangdou  | SC     | Yunnan    |
| Henanzaofeng1                   | HHH    | Henan    | Taiwan75           | SC     | Taiwan    |
| Shangcaiercaoshipingdi<br>ngshi | HHH    | Henan    | Pingguohuangdou    | SC     | Guangxi   |
| Weiqingdou                      | HHH    | Henan    | Guichun1           | SC     | Guangxi   |
| Zhengzhou135                    | HHH    | Henan    | Yulindahuangdou    | SC     | Guangxi   |
| Xudou1                          | HHH    | Jiangsu  | Guichun8           | SC     | Guangxi   |
| Xudou2                          | HHH    | Jiangsu  | Baihuadou          | SC     | Guangdong |
| Xudou5                          | HHH    | Jiangsu  | Ju Huangdadou      | SC     | Guangdong |
| Xudou9                          | HHH    | Jiangsu  | Wuhuasiyuehuang    | SC     | Guangdong |
| Wandou24                        | HHH    | Aahui    | Yangchunqingpidou  | SC     | Guangdong |
| 77-14                           | SC     | Jiangsu  | Heibiqing          | SC     | Guangdong |
| 77-158                          | SC     | Jiangsu  |                    |        |           |

\* NE: Northeast of China; HHH: Huang-Huai-Hai; SC: South of China.

**Supplementary Table S2.** Flowering time of major *GmTCP40* haplotypes across 9 environments with sowing time and day length information

| Environments | Sowing time | Day length from sowing to flowering (h) | Flowering time (d) |               |               |               |
|--------------|-------------|-----------------------------------------|--------------------|---------------|---------------|---------------|
|              |             |                                         | Hap2               | Hap3          | Hap4          | Hap6          |
| SY2016       | December 19 | 14.37                                   | 23.78±1.76 a       | 23.39±1.72 a  | 23.90±1.57 a  | 24.34±1.59 a  |
| JN2016       | July 3      | 14.50                                   | 27.33±6.32 a       | 27.70±7.58 a  | 26.83±4.37 a  | 34.69±8.99 b  |
| XX2016       | July 5      | 14.44                                   | 26.13±6.70 a       | 25.91±7.54 a  | 25.34±4.51 a  | 32.75±9.14 b  |
| BJ2016       | July 3      | 11.89                                   | 29.63±7.82 a       | 30.31±10.14 a | 29.17±6.53 a  | 39.76±11.38 b |
| XT2016       | June 20     | 14.89                                   | 26.47±4.49 a       | 26.78±5.36 a  | 26.63±3.18 a  | 31.00±7.02 b  |
| XX2017       | June 22     | 14.57                                   | 25.48±7.88 a       | 27.11±10.17 a | 26.57±6.81 a  | 37.45±11.71 b |
| BJ2017       | June 17     | 14.28                                   | 29.68±9.68 a       | 32.91±13.81 a | 31.89±9.21 a  | 47.03±15.22 b |
| CC2017       | May 5       | 13.11                                   | 44.91±16.38 a      | 50.50±20.08 a | 49.62±14.77 a | 69.99±19.30 b |
| HH2017       | May 10      | 16.14                                   | 46.99±30.40 a      | 54.35±29.78 a | 64.54±26.61 a | 56.55±41.47 b |

SY2016, JN2016, XX2016, BJ2016, XT2016, XX2017, BJ2017, CC2017, and HH2017: Sanya (18°18' N, 112°39' E) in 2016, Xiangtan (27°40' N, 112°39' E) in 2016, Jining (35°26' N, 116°35' E) in 2016, Xinxiang (35°08' N, 113°45' E) in 2016 and 2017, Beijing (40°13' N, 116°33' E) in 2016 and 2017, Changchun (43°50' N, 124°82' E) in 2017, and Heihe (50°24' N, 127°49' E) in 2017, respectively. The data are presented as the means ± SDs, and a and b indicate significant differences determined by Duncan's test at  $p < 0.05$ .

**Supplementary Table S3** The nucleotide sequences of the primers used in this study.

| Primer name     | Sequence                                     | Annotation                   |
|-----------------|----------------------------------------------|------------------------------|
| TCP40-101-F     | AGAACACGGGGGACTCTAGAATGAAGAAGCTGACAGGTGG     | for cloning<br>GmTCP40       |
| TCP40-101-R     | CCCTTGCTCACCATTTCTAGATCATTGGGAGCTATTAGGATC   |                              |
| 0800-SOC1a-P1-F | GTCGACGGTATCGATaagcttAGGGTAAGGCTGCGTACAAC    | for dual-luciferase<br>assay |
| 0800-SOC1a-P2-F | GTCGACGGTATCGATaagcttGAGGAGAGGGTAATGTCACAAGT |                              |
| 0800-SOC1a-P3-F | GTCGACGGTATCGATaagcttTCCCAGTGGAAGGGGGTTTA    |                              |
| 0800-SOC1a-P4-F | GTCGACGGTATCGATaagcttACATGACGATCAACGTCCCA    |                              |
| 0800-SOC1a-R    | CGCTCTAGAACTAGTggatccTCTCAAAGGAGTCCTAACCAAGT |                              |
| 62-SK-40-F      | GTGGATCCCCCGGGCTGCAGATGAAGAAGCTGACAGGTGG     |                              |
| 62-SK-40-R1     | CAGCGTACCGAATTGGTACCTTGGGAGCTATTAGGATCATC    |                              |
| 0800-SOC1b-P1-F | GTCGACGGTATCGATaagcttTTTTACAGACCTCCTCTAATGAT |                              |
| 0800-SOC1b-P2-F | GTCGACGGTATCGATaagcttTCCGTTAGAGTCTCACCTTCCT  |                              |
| 0800-SOC1b-P3-F | GTCGACGGTATCGATaagcttTTATGTTGTGGTGGCCTGTA    |                              |
| 0800-SOC1b-R    | CGCTCTAGAACTAGTggatccCAAGTAGAATGAACCCAAAA    |                              |
| 0800-AP1a-3K-F  | GTCGACGGTATCGATaagcttTGAAACAGAAATTTGGTCAT    |                              |
| 0800-AP1a-3K-R  | CGCTCTAGAACTAGTggatccATTACTGCTTTTTTTTTTGC    |                              |
| SOC1a-P1-p2u-F  | CggaattcgagctcggtaccAGGGTAAGGCTGCGTACAAC     | for yeast one-<br>hybrid     |
| SOC1a-P2-p2u-F  | CggaattcgagctcggtaccGAGGAGAGGGTAATGTCACAAGT  |                              |
| SOC1a-P3-p2u-F  | CggaattcgagctcggtaccTCCCAGTGGAAGGGGGTTTA     |                              |
| SOC1b-P1-p2u-F  | CggaattcgagctcggtaccTTTTACAGACCTCCTCTAATGAT  |                              |
| SOC1b-P2-p2u-F  | CggaattcgagctcggtaccTCCGTTAGAGTCTCACCTTCCT   |                              |
| SOC1b-P3-p2u-F  | CggaattcgagctcggtaccTTATGTTGTGGTGGCCTGTA     |                              |
| AP1a-p2u-3K-F   | CggaattcgagctcggtaccTGAAACAGAAATTTGGTCAT     |                              |
| AP1a-p2u-3K-R   | TACAGAGCACATGCCTCGAGATTACTGCTTTTTTTTTTGC     |                              |
| SOC1a-p2u-R     | TACAGAGCACATGCCTCGAGTCTCAAAGGAGTCCTAACCAAGT  |                              |
| SOC1b-p2u-R     | TACAGAGCACATGCCTCGAGCAAGTAGAATGAACCCAAAA     |                              |
| qActin-F142     | CGGTGGTTCTATCTTGGCATC                        | for qPCR                     |
| qActin-R142     | GTCTTTCGCTTCAATAACCCTA                       |                              |
| TCP40-qPCR-F1   | AAGAAGCTGACAGGTGGAGC                         |                              |
| TCP40-qPCR-R1   | CAGGCATTCTGAATTTCTGCGG                       |                              |
| qFT1a-F304      | GCCTAGATCAACGGACCCTC                         |                              |
| qFT1a-R304      | TCCGAAGTTTGCCCCTGTAG                         |                              |
| qGmFT1b-144-F   | TTGAAGTTGGTGGTGATGAC                         |                              |
| qGmFT1b-144-R   | CGAAGTTTGCTCCTGTAGTT                         |                              |
| qFT2a-F213      | AAGTTGTCAACCAACCAAGGG                        |                              |
| qFT2a-R213      | GAATCCCCATCATTGGTCTTGG                       |                              |
| qGmFT3a-F       | AGCGCCCAAATAAGAAAGGT                         |                              |
| qGmFT3a-R       | TGGTACATATGAGTGCTTCGGT                       |                              |
| qGmFT3b-202-F   | CTATGAAAGCCCACGACCC                          |                              |
| qGmFT3b-202-R   | TGTTCTACCACCAGAGCCACT                        |                              |
| qFT5a-F139      | GATIGGGGATGTTCTCAACCCT                       |                              |
| qFT5a-R139      | GTCTTCACCACCAACAGTAACCC                      |                              |
| qGmFT5b-RT-F    | GGGTGTGATTGGGGATGTTT                         |                              |
| qGmFT5b-RT-R    | CAGTTCCAAGCCATTGCTAAT                        |                              |
| qGmFT6-121-F    | CCCTCTGTGTTGTGGACGTG                         |                              |
| qGmFT6-121-R    | GGAGGGTTTGAGCTCTCCAC                         |                              |
| qGmAP1a-RT-F    | TGAACATGGGTGGCAATTAC                         |                              |
| qGmAP1a-RT-R    | TGTCAAATGCCATACCAAAG                         |                              |
| qGmAP1b-RT-F    | TGGGAGCAGCCAAACTACAG                         |                              |
| qGmAP1c-RT-F    | GAAAGAAAAGGTTGCAGCTTC                        |                              |
| qGmAP1c-RT-R    | GCATCCAAGGTGACAGGAAT                         |                              |
| GmSOC1a-RT-F    | CGAGTTGCTTTTTTTCCTAG                         |                              |
| GmSOC1a-RT-R    | TGAGTCTTTCCTCTCACCAT                         |                              |
| GmSOC1b-RT-F    | AAGAAGCCCAACTGCAATGT                         |                              |
| GmSOC1b-RT-R    | GGGCTTCAGAAATGAGGAAAGG                       |                              |
| GmFUL1a-RT-F    | CTCCCAACAACACTAGCTC                          |                              |

| Primer name  | Sequence                | Annotation |
|--------------|-------------------------|------------|
| GmFUL1a-RT-R | CCTACAAGACAATTCCAACACGA |            |
| qGmAG-F      | CCCACAACAACACTAGCTCTCA  |            |
| qGmAG-R      | AGTAGTAGCACCCCTTCAATT   |            |

**Supplementary Table S4** The flowering time of the 175 soybean varieties across different environments.

| ID   | Flowering time |        |        |        |        |        |        |        |             | <i>GmTCP40</i><br>Haplotype |
|------|----------------|--------|--------|--------|--------|--------|--------|--------|-------------|-----------------------------|
|      | SY2016         | JN2016 | XX2016 | BJ2016 | XT2016 | XX2017 | BJ2017 | CC2017 | HH2017      |                             |
| A001 | 23.50          | 22.35  | 21.70  | 23.15  | 23.30  | 22.00  | 23.40  | 40.40  | 54.80       | Hap2                        |
| A002 | 23.05          | 22.58  | 22.65  | 23.45  | 23.70  | 20.10  | 23.60  | 38.00  | 51.78       | Hap6                        |
| A003 | 22.55          | 22.05  | 20.73  | 22.47  | 23.60  | 20.00  | 23.70  | 31.67  | 39.00       | Hap3                        |
| A004 | 22.60          | 20.55  | 20.69  | 21.29  | 23.30  | 19.80  | 21.90  | 28.70  | 42.70       | Hap3                        |
| A005 | 23.30          | 21.25  | 19.01  | 21.54  | 22.90  | 20.00  | 24.30  | 34.40  | 58.70       | Hap3                        |
| A006 | 22.15          | 19.60  | 18.76  | 21.25  | 22.00  | 18.20  | 20.80  | 27.60  | 39.80       | Hap2                        |
| A007 | 23.05          | 21.50  | 21.05  | 21.26  | 23.50  | 20.50  | 23.00  | 29.60  | 38.40       | Hap4                        |
| A008 | 22.10          | 19.99  | 17.56  | 19.17  | 20.50  | 16.10  | 19.50  | 28.80  | 35.90       | Hap3                        |
| A009 | 23.05          | 20.40  | 19.69  | 21.35  | 22.50  | 18.70  | 22.70  | 31.50  | 39.00       | Hap3                        |
| A010 | 23.75          | 22.15  | 19.52  | 21.14  | 23.00  | 18.00  | 21.70  | 30.40  | 39.60       | Hap3                        |
| A011 | 22.85          | 22.25  | 23.50  | 20.75  | 22.80  | 19.00  | 20.90  | 30.80  | 40.30       | Hap3                        |
| A012 | 23.60          | 21.10  | 20.25  | 20.81  | 23.20  | 18.40  | 19.70  | 27.10  | 40.00       | Hap4                        |
| A013 | 19.65          | 21.75  | 21.30  | 21.05  | 21.70  | 18.40  | 20.40  | 31.10  | 41.90       | Hap3                        |
| A014 | 22.80          | 23.15  | 22.80  | 20.85  | 24.30  | 19.10  | 23.10  | 32.60  | 61.50       | Hap4                        |
| A015 | 22.35          | 22.90  | 20.63  | 24.45  | 24.40  | 21.20  | 25.50  | 41.30  | 59.40       | Hap3                        |
| A016 | 24.45          | 23.29  | 19.90  | 26.45  | 24.33  | 23.30  | 25.90  | 47.75  | 69.70       | Hap1                        |
| A017 | 23.70          | 24.25  | 22.40  | 26.39  | 22.10  | 22.80  | 26.50  | 48.80  | 69.50       | Hap3                        |
| A018 | 21.35          | 24.20  | 20.36  | 23.10  | 22.30  | 16.78  | 22.30  | 35.80  | 63.10       | Hap3                        |
| A019 | 22.40          | 25.05  | 23.05  | 26.75  | 25.70  | 22.17  | 27.50  | 44.80  | 72.20       | Hap3                        |
| A020 | 23.00          | 28.50  | 25.65  | 32.71  | 27.00  | 29.20  | 32.90  | 56.90  | 78.60       | Hap3                        |
| A021 | 22.30          | 29.50  | 26.76  | 32.88  | 28.30  | 29.10  | 37.40  | 61.00  | 82.90       | Hap3                        |
| A022 | 23.35          | 24.10  | 21.23  | 24.47  | 23.00  | 20.70  | 26.60  | 40.60  | 66.70       | Hap3                        |
| A023 | 22.00          | 24.45  | 22.94  | 23.86  | 24.70  | 21.40  | 25.50  | 37.90  | 62.40       | Hap3                        |
| A024 | 24.30          | 24.95  | 23.80  | 28.05  | 25.20  | 21.70  | 27.00  | 47.63  | 70.90       | Hap3                        |
| A025 | 22.90          | 29.00  | 25.19  | 31.75  | 28.10  | 27.40  | 32.40  | 54.20  | 80.20       | Hap3                        |
| A026 | 23.50          | 29.00  | 27.23  | 33.55  | 28.80  | 31.60  | 36.70  | 59.70  | 89.50       | Hap3                        |
| A027 | 22.85          | 28.50  | 24.42  | 33.60  | 26.00  | 25.50  | 36.00  | 59.60  | 92.20       | Hap3                        |
| A028 | 22.75          | 27.50  | 24.95  | 32.00  | 25.70  | 24.40  | 33.30  | 58.60  | 81.80       | Hap4                        |
| A029 | 22.85          | 27.60  | 25.22  | 29.35  | 25.10  | 27.20  | 31.00  | 50.50  | 72.70       | Hap6                        |
| A030 | 23.45          | 29.50  | 28.83  | 34.88  | 28.20  | 32.20  | 38.40  | 61.90  | 95.00       | Hap3                        |
| A031 | 23.60          | 28.90  | 27.46  | 31.91  | 25.60  | 28.80  | 32.20  | 56.40  | 82.90       | Hap3                        |
| A032 | 26.45          | 34.50  | 31.05  | 36.76  | 30.10  | 37.60  | 45.40  | 68.90  | Unflowering | Hap6                        |
| A033 | 24.65          | 32.50  | 30.63  | 36.45  | 30.20  | 37.90  | 41.30  | 64.40  | 95.43       | Hap6                        |
| A034 | 23.95          | 31.00  | 31.65  | 36.05  | 30.00  | 31.80  | 41.70  | 62.10  | 92.78       | Hap4                        |
| A035 | 25.75          | 34.00  | 34.15  | 38.95  | 34.80  | 38.00  | 44.00  | 69.80  | Unflowering | Hap3                        |
| A036 | 26.30          | 33.00  | 32.30  | 36.33  | 31.10  | 33.80  | 43.10  | 62.90  | 86.00       | Hap6                        |
| A037 | 26.70          | 35.70  | 35.58  | 41.35  | 32.70  | 39.40  | 46.70  | 72.40  | Unflowering | Hap3                        |
| A038 | 24.20          | 33.00  | 30.85  | 40.48  | 26.50  | 36.70  | 48.10  | 69.80  | 96.00       | Hap6                        |
| A039 | 24.05          | 34.00  | 34.15  | 41.30  | 31.90  | 36.30  | 44.90  | 66.60  | 94.50       | Hap3                        |
| A040 | 23.05          | 32.50  | 31.05  | 36.30  | 24.30  | 19.60  | 25.30  | 38.70  | 71.90       | Hap2                        |
| A041 | 25.55          | 32.50  | 32.78  | 38.45  | 30.80  | 36.80  | 44.70  | 70.30  | Unflowering | Hap4                        |
| A042 | 22.55          | 33.00  | 30.10  | 37.80  | 28.20  | 32.60  | 49.10  | 77.90  | Unflowering | Hap3                        |
| A043 | 23.35          | 33.00  | 29.45  | 37.05  | 26.50  | 30.30  | 47.40  | 70.60  | 95.00       | Hap3                        |
| A044 | 23.80          | 31.00  | 30.15  | 35.19  | 29.50  | 32.50  | 41.50  | 64.20  | 91.40       | Hap3                        |
| A045 | 27.35          | 36.50  | 36.82  | 41.85  | 35.40  | 39.40  | 48.00  | 73.30  | Unflowering | Hap3                        |

| ID   | Flowering time |        |        |        |        |        |        |        |             | <i>GmTCP40</i><br>Haplotype |
|------|----------------|--------|--------|--------|--------|--------|--------|--------|-------------|-----------------------------|
|      | SY2016         | JN2016 | XX2016 | BJ2016 | XT2016 | XX2017 | BJ2017 | CC2017 | HH2017      |                             |
| A046 | 23.85          | 44.00  | 42.80  | 57.75  | 36.00  | 48.40  | 67.75  | 96.50  | Unflowering | Hap3                        |
| A047 | 29.15          | 47.00  | 46.20  | 54.85  | 41.90  | 50.40  | 66.20  | 92.80  | 79.50       | Hap3                        |
| A048 | 28.20          | 40.00  | 37.15  | 47.03  | 36.00  | 45.60  | 54.80  | 80.20  | Unflowering | Hap3                        |
| A049 | 26.00          | 35.50  | 33.15  | 41.00  | 33.90  | 44.40  | 47.30  | 70.40  | Unflowering | Hap3                        |
| A050 | 24.75          | 38.00  | 35.38  | 44.55  | 31.70  | 42.10  | 58.00  | 85.40  | Unflowering | Hap6                        |
| A051 | 26.00          | 40.20  | 38.40  | 49.25  | 32.90  | 42.90  | 62.13  | 91.20  | Unflowering | Hap3                        |
| A052 | 25.56          | 41.00  | 39.10  | 50.07  | 35.00  | 47.90  | 63.20  | 93.00  | Unflowering | Hap3                        |
| A053 | 25.60          | 41.50  | 37.90  | 49.43  | 34.60  | 45.30  | 61.90  | 91.70  | Unflowering | Hap3                        |
| A054 | 25.25          | 39.50  | 37.92  | 46.04  | 34.60  | 42.80  | 53.50  | 84.70  | Unflowering | Hap6                        |
| A055 | 26.20          | 40.00  | 40.01  | 49.19  | 34.60  | 45.03  | 63.10  | 91.40  | Unflowering | Hap3                        |
| A056 | 22.55          | 47.00  | 43.90  | 55.76  | 36.10  | 50.27  | 68.15  | 105.70 | Unflowering | Hap6                        |
| A057 | 26.40          | 61.00  | 59.70  | 70.74  | 50.00  | 66.30  | 83.21  | 109.50 | Unflowering | Hap6                        |
| A058 | 25.93          | 55.00  | 55.20  | 67.56  | 52.40  | 70.00  | 82.50  | 108.90 | Unflowering | Hap6                        |
| A059 | 25.62          | 52.50  | 50.54  | 60.69  | 41.20  | 60.20  | 73.79  | 101.33 | Unflowering | Hap6                        |
| A060 | 28.40          | 46.00  | 42.20  | 48.96  | 44.50  | 45.50  | 56.70  | 86.10  | Unflowering | Hap6                        |
| A061 | 22.85          | 24.05  | 22.35  | 23.40  | 24.40  | 21.00  | 24.50  | 34.80  | 56.50       | Hap3                        |
| A062 | 24.10          | 29.50  | 27.11  | 32.57  | 27.70  | 30.98  | 34.20  | 56.90  | 78.00       | Hap4                        |
| A063 | 25.00          | 35.00  | 34.21  | 38.69  | 32.20  | 36.70  | 43.90  | 70.10  | Unflowering | Hap2                        |
| A064 | 21.80          | 31.50  | 27.50  | 35.94  | 26.50  | 36.60  | 47.10  | 72.00  | 94.00       | Hap6                        |
| A065 | 25.60          | 37.00  | 36.13  | 42.10  | 35.30  | 39.60  | 51.00  | 76.50  | Unflowering | Hap6                        |
| A066 | 25.55          | 35.95  | 33.84  | 38.67  | 31.90  | 37.00  | 45.60  | 65.80  | 94.00       | Hap6                        |
| A067 | 24.25          | 37.00  | 37.05  | 46.81  | 32.10  | 42.90  | 57.40  | 78.50  | Unflowering | Hap6                        |
| A068 | 25.50          | 69.00  | 62.05  | 74.19  | 56.50  | 75.20  | 85.67  | 114.50 | Unflowering | Hap3                        |
| A069 | 23.15          | 20.85  | 19.66  | 22.36  | 20.90  | 18.40  | 20.90  | 29.60  | 38.30       | Hap3                        |
| A070 | 22.60          | 19.25  | 19.11  | 19.45  | 21.20  | 18.50  | 19.90  | 29.80  | 37.00       | Hap3                        |
| A071 | 21.10          | 20.75  | 18.65  | 20.90  | 22.00  | 18.70  | 21.10  | 32.00  | 45.20       | Hap2                        |
| A072 | 21.45          | 19.75  | 19.40  | 19.01  | 20.00  | 17.50  | 19.20  | 29.20  | 40.60       | Hap3                        |
| A073 | 22.65          | 20.68  | 21.25  | 19.46  | 21.10  | 19.50  | 20.70  | 30.40  | 39.80       | Hap4                        |
| A074 | 21.80          | 20.60  | 18.70  | 19.68  | 21.80  | 17.10  | 20.30  | 29.80  | 38.90       | Hap3                        |
| A075 | 22.90          | 20.69  | 19.75  | 21.35  | 22.60  | 18.90  | 21.10  | 29.20  | 40.56       | Hap3                        |
| A076 | 22.80          | 19.15  | 18.75  | 18.55  | 20.00  | 17.40  | 18.90  | 27.50  | 35.30       | Hap3                        |
| A077 | 22.00          | 23.15  | 21.05  | 24.51  | 23.70  | 20.70  | 23.30  | 36.20  | 60.25       | Hap4                        |
| A078 | 22.55          | 22.30  | 19.44  | 23.55  | 24.20  | 19.60  | 22.40  | 34.50  | 65.20       | Hap3                        |
| A079 | 21.70          | 22.30  | 19.75  | 22.06  | 24.60  | 20.10  | 22.50  | 36.80  | 66.60       | Hap3                        |
| A080 | 21.05          | 21.00  | 21.00  | 21.98  | 23.00  | 19.30  | 20.80  | 34.30  | 45.00       | Hap3                        |
| A081 | 23.50          | 22.95  | 22.35  | 23.52  | 25.70  | 21.70  | 23.20  | 36.20  | 58.00       | Hap4                        |
| A082 | 22.95          | 22.80  | 21.17  | 24.30  | 25.40  | 21.70  | 23.50  | 36.00  | 61.40       | Hap3                        |
| A083 | 22.25          | 23.25  | 20.90  | 24.92  | 24.20  | 21.10  | 24.00  | 36.50  | 58.70       | Hap4                        |
| A084 | 22.60          | 22.95  | 20.42  | 22.18  | 24.60  | 19.20  | 22.10  | 36.60  | 52.00       | Hap4                        |
| A085 | 22.80          | 23.20  | 20.80  | 24.30  | 24.30  | 20.40  | 22.00  | 31.50  | 45.30       | Hap2                        |
| A086 | 22.65          | 22.40  | 21.74  | 22.90  | 23.60  | 21.30  | 21.50  | 35.80  | 55.90       | Hap3                        |
| A087 | 23.30          | 22.93  | 21.45  | 23.25  | 24.70  | 20.10  | 22.80  | 34.90  | 42.43       | Hap4                        |
| A088 | 22.55          | 33.50  | 19.44  | 30.30  | 24.10  | 19.60  | 21.50  | 30.00  | 40.83       | Hap3                        |
| A089 | 22.60          | 20.15  | 18.50  | 21.05  | 22.30  | 19.00  | 21.50  | 29.70  | 42.50       | Hap4                        |
| A090 | 22.85          | 20.95  | 19.69  | 22.22  | 23.40  | 19.00  | 22.80  | 30.40  | 44.14       | Hap3                        |
| A091 | 22.90          | 22.95  | 20.30  | 23.15  | 23.70  | 18.90  | 22.60  | 32.67  | 44.10       | Hap3                        |
| A092 | 22.70          | 22.80  | 20.65  | 23.00  | 23.80  | 20.30  | 23.80  | 32.80  | 53.90       | Hap3                        |

| ID   | Flowering time |        |        |        |        |        |        |        |        | <i>GmTCP40</i><br>Haplotype |
|------|----------------|--------|--------|--------|--------|--------|--------|--------|--------|-----------------------------|
|      | SY2016         | JN2016 | XX2016 | BJ2016 | XT2016 | XX2017 | BJ2017 | CC2017 | HH2017 |                             |
| A093 | 22.75          | 21.60  | 22.33  | 23.90  | 24.10  | 20.40  | 23.00  | 32.10  | 40.50  | Hap3                        |
| A094 | 23.05          | 21.35  | 19.45  | 21.94  | 22.70  | 18.60  | 21.50  | 29.10  | 41.43  | Hap2                        |
| A095 | 22.00          | 20.80  | 20.50  | 22.70  | 22.00  | 20.10  | 21.60  | 35.40  | 54.90  | Hap3                        |
| A096 | 23.80          | 21.80  | 21.35  | 21.55  | 23.30  | 19.40  | 23.00  | 35.30  | 52.60  | Hap3                        |
| A097 | 22.80          | 22.50  | 21.90  | 22.90  | 23.20  | 20.80  | 22.60  | 36.25  | 43.13  | Hap3                        |
| A098 | 22.10          | 22.85  | 21.24  | 24.67  | 23.90  | 19.70  | 24.00  | 32.40  | 43.75  | Hap3                        |
| A099 | 22.00          | 22.60  | 21.25  | 23.20  | 24.40  | 19.20  | 23.30  | 37.90  | 57.20  | Hap3                        |
| A100 | 22.20          | 22.60  | 20.88  | 22.55  | 24.20  | 20.30  | 24.10  | 33.50  | 54.10  | Hap6                        |
| A101 | 22.15          | 23.10  | 19.75  | 21.94  | 23.10  | 19.00  | 22.50  | 31.40  | 46.25  | Hap3                        |
| A102 | 22.20          | 22.50  | 19.60  | 20.98  | 23.80  | 19.80  | 23.40  | 34.00  | 45.56  | Hap3                        |
| A103 | 22.70          | 22.57  | 22.50  | 26.50  | 23.80  | 21.00  | 24.40  | 38.60  | 61.90  | Hap6                        |
| A104 | 24.00          | 31.40  | 28.12  | 33.71  | 29.00  | 33.80  | 35.60  | 60.30  | 83.10  | Hap3                        |
| A105 | 24.75          | 32.50  | 31.28  | 36.94  | 30.70  | 34.90  | 40.90  | 60.70  | 83.50  | Hap3                        |
| A106 | 22.50          | 28.75  | 25.20  | 29.41  | 24.80  | 26.90  | 28.60  | 46.60  | 72.80  | Hap3                        |
| A107 | 23.45          | 23.65  | 20.74  | 27.10  | 24.00  | 21.40  | 26.50  | 42.50  | 72.10  | Hap3                        |
| A108 | 23.85          | 25.15  | 21.05  | 29.90  | 25.60  | 21.90  | 28.70  | 51.70  | 76.00  | Hap3                        |
| A109 | 23.40          | 26.00  | 20.70  | 27.28  | 24.30  | 24.00  | 26.40  | 47.10  | 72.50  | Hap3                        |
| A110 | 21.40          | 23.00  | 21.70  | 24.79  | 24.40  | 20.30  | 21.00  | 32.60  | 63.14  | Hap3                        |
| A111 | 21.55          | 23.60  | 20.68  | 22.87  | 22.50  | 19.60  | 22.40  | 38.30  | 76.50  | Hap3                        |
| A112 | 26.70          | 25.90  | 24.75  | 26.40  | 30.50  | 34.60  | 41.80  | 65.70  | 82.33  | Hap3                        |
| A113 | 21.45          | 23.25  | 22.18  | 24.83  | 24.10  | 20.10  | 24.10  | 43.75  | 67.80  | Hap3                        |
| A114 | 22.50          | 26.80  | 23.91  | 28.27  | 26.30  | 24.40  | 29.60  | 53.10  | 85.70  | Hap3                        |
| A115 | 22.55          | 24.60  | 23.54  | 25.49  | 24.70  | 22.80  | 27.90  | 47.10  | 69.67  | Hap3                        |
| A116 | 20.90          | 23.98  | 20.91  | 21.84  | 21.50  | 18.10  | 22.20  | 35.50  | 59.90  | Hap3                        |
| A117 | 22.85          | 24.67  | 23.93  | 27.34  | 26.10  | 23.00  | 26.20  | 38.10  | 65.10  | Hap3                        |
| A118 | 23.05          | 25.25  | 23.60  | 27.47  | 25.50  | 23.40  | 26.10  | 39.00  | 64.90  | Hap3                        |
| A119 | 22.85          | 23.35  | 21.25  | 24.08  | 24.40  | 20.60  | 23.70  | 37.40  | 67.20  | Hap3                        |
| A120 | 21.35          | 20.90  | 20.05  | 22.75  | 22.40  | 18.60  | 21.60  | 33.40  | 47.10  | Hap3                        |
| A121 | 22.50          | 29.00  | 24.85  | 29.75  | 26.90  | 30.20  | 31.10  | 53.00  | 76.40  | Hap3                        |
| A122 | 22.60          | 22.95  | 20.60  | 21.52  | 22.90  | 20.30  | 23.40  | 31.50  | 67.00  | Hap3                        |
| A123 | 24.25          | 25.15  | 21.30  | 24.30  | 28.70  | 27.10  | 32.60  | 53.70  | 73.30  | Hap3                        |
| A124 | 23.45          | 29.20  | 27.30  | 31.35  | 28.40  | 32.20  | 36.20  | 56.00  | 73.60  | Hap5                        |
| A125 | 21.75          | 22.25  | 20.98  | 24.74  | 23.20  | 21.30  | 24.40  | 34.10  | 66.56  | Hap3                        |
| A126 | 22.60          | 24.95  | 22.61  | 26.20  | 25.30  | 22.00  | 24.00  | 38.78  | 65.50  | Hap3                        |
| A127 | 22.90          | 24.55  | 21.48  | 22.18  | 24.20  | 20.30  | 25.20  | 41.00  | 67.10  | Hap6                        |
| A128 | 22.05          | 23.40  | 21.00  | 24.25  | 23.30  | 20.10  | 24.70  | 40.00  | 68.60  | Hap3                        |
| A129 | 22.70          | 23.75  | 22.35  | 24.97  | 25.60  | 23.40  | 26.40  | 43.60  | 67.20  | Hap4                        |
| A130 | 25.05          | 30.00  | 30.05  | 37.25  | 25.90  | 34.40  | 47.10  | 66.10  | 84.10  | Hap6                        |
| A131 | 23.15          | 32.00  | 33.05  | 40.24  | 28.10  | 37.90  | 51.40  | 71.70  | 90.70  | Hap6                        |
| A132 | 23.50          | 34.00  | 33.10  | 40.07  | 31.30  | 37.20  | 44.20  | 64.60  | 98.30  | Hap3                        |
| A133 | 22.50          | 31.50  | 28.45  | 37.01  | 26.60  | 34.80  | 49.33  | 71.70  | 125.00 | Hap3                        |
| A134 | 21.25          | 29.90  | 29.58  | 34.87  | 27.00  | 27.40  | 32.80  | 44.13  | 67.00  | Hap3                        |
| A135 | 23.10          | 30.00  | 27.56  | 37.05  | 26.10  | 36.70  | 46.50  | 71.10  | 97.30  | Hap6                        |
| A136 | 23.05          | 26.00  | 22.05  | 30.69  | 23.70  | 23.30  | 38.40  | 58.30  | 83.10  | Hap4                        |
| A137 | 22.15          | 31.90  | 24.95  | 37.50  | 25.50  | 35.90  | 48.80  | 73.80  | 99.00  | Hap6                        |
| A138 | 21.85          | 30.00  | 25.13  | 35.34  | 26.30  | 36.90  | 47.50  | 73.10  | 99.00  | Hap4                        |
| A139 | 23.65          | 32.50  | 30.00  | 38.19  | 30.90  | 35.20  | 42.90  | 63.20  | 95.60  | Hap6                        |

| ID   | Flowering time |        |        |        |        |        |        |        |             | <i>GmTCP40</i><br>Haplotype |
|------|----------------|--------|--------|--------|--------|--------|--------|--------|-------------|-----------------------------|
|      | SY2016         | JN2016 | XX2016 | BJ2016 | XT2016 | XX2017 | BJ2017 | CC2017 | HH2017      |                             |
| A140 | 27.60          | 34.25  | 33.49  | 40.12  | 32.00  | 34.80  | 45.20  | 63.00  | 98.00       | Hap4                        |
| A141 | 23.25          | 27.75  | 26.35  | 31.94  | 27.40  | 26.70  | 34.10  | 57.20  | 88.60       | Hap6                        |
| A142 | 25.50          | 34.10  | 31.80  | 37.59  | 33.10  | 36.40  | 41.60  | 65.10  | Unflowering | Hap2                        |
| A143 | 25.05          | 33.45  | 31.17  | 37.33  | 31.70  | 36.30  | 44.70  | 74.80  | Unflowering | Hap3                        |
| A144 | 27.70          | 32.50  | 30.70  | 35.84  | 31.50  | 32.70  | 37.00  | 61.20  | 86.00       | Hap4                        |
| A145 | 25.50          | 27.40  | 27.05  | 34.96  | 30.70  | 35.40  | 41.20  | 65.70  | 88.40       | Hap4                        |
| A146 | 24.70          | 28.50  | 25.59  | 31.60  | 28.00  | 29.20  | 32.10  | 57.10  | 90.30       | Hap4                        |
| A147 | 22.15          | 28.50  | 27.12  | 32.30  | 26.90  | 28.80  | 35.70  | 62.00  | 83.00       | Hap6                        |
| A148 | 23.95          | 35.50  | 35.69  | 41.71  | 31.80  | 38.40  | 47.60  | 76.50  | Unflowering | Hap3                        |
| A149 | 24.05          | 31.00  | 31.57  | 36.80  | 30.00  | 33.50  | 40.00  | 60.75  | 83.90       | Hap3                        |
| A150 | 22.65          | 32.00  | 29.08  | 35.40  | 28.50  | 33.57  | 38.70  | 60.80  | 93.38       | Hap3                        |
| A151 | 25.00          | 28.00  | 25.73  | 27.96  | 24.70  | 23.00  | 27.40  | 47.40  | 68.30       | Hap4                        |
| A152 | 24.35          | 32.00  | 33.00  | 36.83  | 30.90  | 36.40  | 43.20  | 63.20  | 94.40       | Hap6                        |
| A153 | 23.55          | 30.00  | 28.05  | 34.79  | 27.00  | 28.80  | 35.10  | 58.20  | 82.20       | Hap3                        |
| A154 | 24.85          | 32.00  | 29.90  | 34.63  | 30.40  | 33.40  | 39.80  | 60.90  | 80.50       | Hap3                        |
| A155 | 23.65          | 29.50  | 26.14  | 29.35  | 28.00  | 26.10  | 31.30  | 51.80  | 71.20       | Hap4                        |
| A156 | 26.45          | 34.00  | 33.60  | 39.25  | 31.90  | 38.30  | 43.80  | 64.78  | Unflowering | Hap4                        |
| A157 | 27.10          | 31.90  | 32.65  | 35.27  | 30.20  | 30.20  | 37.50  | 49.86  | 77.80       | Hap2                        |
| A158 | 24.05          | 26.30  | 26.20  | 27.16  | 26.70  | 23.60  | 28.40  | 45.30  | 67.30       | Hap4                        |
| A159 | 22.60          | 23.45  | 22.75  | 26.87  | 23.50  | 20.30  | 26.80  | 44.00  | 74.80       | Hap3                        |
| A160 | 24.75          | 30.00  | 29.71  | 35.45  | 26.40  | 35.40  | 47.40  | 66.50  | 85.50       | Hap3                        |
| A161 | 22.60          | 22.70  | 21.50  | 25.70  | 23.30  | 20.60  | 24.00  | 35.00  | 71.00       | Hap3                        |
| A162 | 24.75          | 32.50  | 30.90  | 36.55  | 32.00  | 36.60  | 40.50  | 71.80  | 84.00       | Hap6                        |
| A163 | 23.55          | 29.05  | 25.40  | 32.15  | 25.90  | 29.90  | 35.10  | 58.70  | 82.40       | Hap6                        |
| A164 | 27.95          | 37.50  | 35.85  | 40.41  | 33.40  | 37.60  | 47.70  | 76.50  | Unflowering | Hap3                        |
| A165 | 28.05          | 35.40  | 37.60  | 43.14  | 34.60  | 39.90  | 51.40  | 79.40  | Unflowering | Hap3                        |
| A166 | 24.55          | 32.50  | 32.20  | 36.90  | 30.60  | 34.00  | 39.70  | 64.70  | 93.70       | Hap2                        |
| A167 | 26.05          | 40.25  | 37.28  | 47.20  | 32.80  | 43.90  | 59.40  | 89.60  | Unflowering | Hap6                        |
| A168 | 25.85          | 26.20  | 22.55  | 27.54  | 24.90  | 23.20  | 26.60  | 45.80  | 62.00       | Hap6                        |
| A169 | 25.60          | 37.00  | 35.28  | 44.00  | 31.20  | 40.80  | 53.90  | 72.30  | 97.20       | Hap6                        |
| A170 | 23.45          | 36.50  | 33.15  | 41.15  | 30.30  | 38.70  | 50.70  | 71.10  | 91.43       | Hap6                        |
| A171 | 24.75          | 32.50  | 30.65  | 36.80  | 30.80  | 36.80  | 44.10  | 69.20  | 94.83       | Hap4                        |
| A172 | 23.60          | 29.40  | 28.92  | 32.70  | 27.60  | 30.50  | 40.80  | 61.50  | 82.70       | Hap4                        |
| A173 | 26.30          | 30.00  | 29.70  | 33.33  | 29.90  | 30.70  | 36.80  | 55.10  | 81.56       | Hap3                        |
| A174 | 22.35          | 23.33  | 21.16  | 24.01  | 23.90  | 19.10  | 24.30  | 41.10  | 62.60       | Hap3                        |
| A175 | 25.50          | 42.00  | 44.96  | 56.43  | 36.60  | 48.00  | 67.17  | 99.10  | Unflowering | Hap3                        |

SY2016, JN2016, XX2016, BJ2016, XT2016, XX2017, BJ2017, CC2017, and HH2017: Sanya (18°18' N, 112°39' E) in 2016, Xiangtan (27°40' N, 112°39' E) in 2016, Jining (35°26' N, 116°35' E) in 2016, Xinxiang (35°08' N, 113°45' E) in 2016 and 2017, Beijing (40°13' N, 116°33' E) in 2016 and 2017, Changchun (43°50' N, 124°82' E) in 2017, and Heihe (50°24' N, 127°49' E) in 2017, respectively.

**Supplementary Table S5** The functional predictions of *cis*-elements identified in the *GmTCP40* promoter.

| Element     | Motif sequence | Position | Function                                                        |
|-------------|----------------|----------|-----------------------------------------------------------------|
| TATA-box    | ATATAT         | 239338   | core promoter element around -30 of transcription start         |
| TATA-box    | TATA           | 239339   | core promoter element around -30 of transcription start         |
| CAAT-box    | CAAT           | 239352   | common cis-acting element in promoter and enhancer regions      |
| CAAT-box    | CAAT           | 239379   | common cis-acting element in promoter and enhancer regions      |
| TATA-box    | ccTATAAAaa     | 239419   | core promoter element around -30 of transcription start         |
| TATA-box    | TATAAAA        | 239420   | core promoter element around -30 of transcription start         |
| TATA-box    | TATAAA         | 239421   | core promoter element around -30 of transcription start         |
| TATA-box    | TATAA          | 239422   | core promoter element around -30 of transcription start         |
| TATA-box    | TATACA         | 239452   | core promoter element around -30 of transcription start         |
| TATA-box    | TATA           | 239454   | core promoter element around -30 of transcription start         |
| Box 4       | ATTAAT         | 239508   | part of a conserved DNA module involved in light responsiveness |
| CAAT-box    | CCCAATTT       | 239518   | common cis-acting element in promoter and enhancer regions      |
| CAAT-box    | CCAAT          | 239519   | common cis-acting element in promoter and enhancer regions      |
| CAAT-box    | CAAT           | 239520   | common cis-acting element in promoter and enhancer regions      |
| Myb         | TAACGT         | 239556   |                                                                 |
| TATA-box    | ATATAT         | 239585   | core promoter element around -30 of transcription start         |
| TATA-box    | TATATA         | 239586   | core promoter element around -30 of transcription start         |
| AT~TATA-box | TATATA         | 239586   | core promoter element around -30 of transcription start         |
| TATA-box    | TATA           | 239588   | core promoter element around -30 of transcription start         |
| Box 4       | ATTAAT         | 239607   | part of a conserved DNA module involved in light responsiveness |
| CAAT-box    | CAAT           | 239611   | common cis-acting element in promoter and enhancer regions      |
| MBS         | CAACTG         | 239633   | MYB binding site involved in drought-inducibility               |
| Myb         | CAACTG         | 239633   |                                                                 |
| CAAT-box    | CAAAT          | 239639   | common cis-acting element in promoter and enhancer regions      |
| ERE         | ATTTTAAA       | 239649   |                                                                 |
| CAAT-box    | CAAT           | 239655   | common cis-acting element in promoter and enhancer regions      |
| TATA-box    | ATTATA         | 239676   | core promoter element around -30 of transcription start         |
| TATA-box    | TATAA          | 239677   | core promoter element around -30 of transcription start         |
| TATA-box    | TATA           | 239678   | core promoter element around -30 of transcription start         |
| TATA-box    | TATA           | 239712   | core promoter element around -30 of transcription start         |
| STRE        | AGGGG          | 239724   |                                                                 |
| CAAT-box    | CCAAT          | 239735   | common cis-acting element in promoter and enhancer regions      |
| CAAT-box    | CAAT           | 239740   | common cis-acting element in promoter and enhancer regions      |
| WUN-motif   | AAATTACT       | 239754   |                                                                 |
| TATA-box    | TATAAA         | 239781   | core promoter element around -30 of transcription start         |
| TATA-box    | TATAA          | 239782   | core promoter element around -30 of transcription start         |
| TATA-box    | TATA           | 239783   | core promoter element around -30 of transcription start         |
| CAAT-box    | CAAT           | 239794   | common cis-acting element in promoter and enhancer regions      |
| WUN-motif   | AAATTTCTT      | 239825   |                                                                 |
| GATA-motif  | GATAGGG        | 239861   | part of a light responsive element                              |
| STRE        | AGGGG          | 239864   |                                                                 |
| CAAT-box    | CAAT           | 239926   |                                                                 |
| Box II      | TGGTAATAA      | 239936   | part of a light responsive element                              |
| AAGAA-motif | GAAAGAA        | 239973   |                                                                 |
| Unnamed_4   | CTCC           | 240015   |                                                                 |
| TATA-box    | ccTATAAAaa     | 240080   | core promoter element around -30 of transcription start         |
| STRE        | AGGGG          | 240087   |                                                                 |

| Element     | Motif sequence | Position | Function                                                        |
|-------------|----------------|----------|-----------------------------------------------------------------|
| MRE         | AACCTAA        | 240121   | MYB binding site involved in light responsiveness               |
| Unnamed__4  | CTCC           | 240170   |                                                                 |
| Unnamed__4  | CTCC           | 240176   |                                                                 |
| Unnamed__4  | CTCC           | 240179   |                                                                 |
| Unnamed__4  | CTCC           | 240188   |                                                                 |
| TATA-box    | TATATAA        | 240195   | core promoter element around -30 of transcription start         |
| TATA-box    | TATATA         | 240196   | core promoter element around -30 of transcription start         |
| TATA-box    | ATATAA         | 240197   | core promoter element around -30 of transcription start         |
| TATA-box    | TATA           | 240198   | core promoter element around -30 of transcription start         |
| CAAT-box    | TGCCAAC        | 240207   | common cis-acting element in promoter and enhancer regions      |
| TATA-box    | ATATAA         | 240213   | core promoter element around -30 of transcription start         |
| TATA-box    | TATA           | 240214   | core promoter element around -30 of transcription start         |
| CAAT-box    | CCAAT          | 240221   | common cis-acting element in promoter and enhancer regions      |
| TATA-box    | TATAA          | 240315   | core promoter element around -30 of transcription start         |
| TATA-box    | TATA           | 240316   | core promoter element around -30 of transcription start         |
| TATA-box    | TATAA          | 240361   | core promoter element around -30 of transcription start         |
| TATA-box    | TATA           | 240362   | core promoter element around -30 of transcription start         |
| Box 4       | ATTAAT         | 240386   | part of a conserved DNA module involved in light responsiveness |
| CAAT-box    | CAAT           | 240415   | common cis-acting element in promoter and enhancer regions      |
| CAAT-box    | CAAT           | 240422   | common cis-acting element in promoter and enhancer regions      |
| TATA-box    | ATTATA         | 240450   | core promoter element around -30 of transcription start         |
| TATA-box    | TATAA          | 240451   | core promoter element around -30 of transcription start         |
| TATA-box    | TATA           | 240452   | core promoter element around -30 of transcription start         |
| TATA-box    | TATA           | 240495   | core promoter element around -30 of transcription start         |
| TATA-box    | ATTATA         | 240501   | core promoter element around -30 of transcription start         |
| TATA-box    | TATAA          | 240502   | core promoter element around -30 of transcription start         |
| TATA-box    | TATA           | 240503   | core promoter element around -30 of transcription start         |
| ERE         | ATTTTAAA       | 240530   |                                                                 |
| ERE         | ATTTTAAA       | 240532   |                                                                 |
| TATA-box    | ATATAA         | 240538   |                                                                 |
| TATA-box    | TATA           | 240539   |                                                                 |
| TATA-box    | ATTATA         | 240550   |                                                                 |
| TATA-box    | TATAA          | 240551   | core promoter element around -30 of transcription start         |
| TATA-box    | TATA           | 240552   | core promoter element around -30 of transcription start         |
| TATA-box    | ATATAA         | 240577   | core promoter element around -30 of transcription start         |
| TATA-box    | TATA           | 240578   | core promoter element around -30 of transcription start         |
| ERE         | ATTTTAAA       | 240600   | cis-acting element involved in light responsiveness             |
| ERE         | ATTTTAAA       | 240602   |                                                                 |
| ACE         | CTAACGTATT     | 240607   |                                                                 |
| CAAT-box    | CAAT           | 240636   |                                                                 |
| TATA-box    | ATTATA         | 240645   |                                                                 |
| TATA-box    | TATATAA        | 240646   | core promoter element around -30 of transcription start         |
| TATA-box    | TATATA         | 240647   | core promoter element around -30 of transcription start         |
| AT~TATA-box | TATATA         | 240647   | core promoter element around -30 of transcription start         |
| TATA-box    | ATATAA         | 240648   | core promoter element around -30 of transcription start         |
| TATA-box    | TATA           | 240649   | core promoter element around -30 of transcription start         |
| CAAT-box    | CAAT           | 240685   | cis-acting regulatory element involved in light responsiveness  |
| G-box       | TAACACGTAG     | 240700   |                                                                 |

| Element              | Motif sequence | Position | Function                                                            |
|----------------------|----------------|----------|---------------------------------------------------------------------|
| ABRE                 | GACACGTGGC     | 240701   | cis-acting element involved in the abscisic acid responsiveness     |
| G-box                | ACACGTGGC      | 240702   | cis-acting regulatory element involved in light responsiveness      |
| G-box                | CACGTG         | 240703   | cis-acting regulatory element involved in light responsiveness      |
| G-Box                | CACGTG         | 240703   | cis-acting regulatory element involved in light responsiveness      |
| ABRE                 | CACGTG         | 240703   | cis-acting element involved in the abscisic acid responsiveness     |
| ABRE                 | ACGTG          | 240704   | cis-acting element involved in the abscisic acid responsiveness     |
| Unnamed__1           | CGTGG          | 240705   |                                                                     |
| CAAT-box             | CAAAT          | 240716   | common cis-acting element in promoter and enhancer regions          |
| TC-rich repeats      | ATTCTCTAAC     | 240783   | cis-acting element involved in defense and stress responsiveness    |
| MYB-like<br>sequence | TAACCA         | 240789   |                                                                     |
| MYB                  | TAACCA         | 240789   |                                                                     |
| CAAT-box             | CCAAT          | 240804   | common cis-acting element in promoter and enhancer regions          |
| CAAT-box             | CAAT           | 240826   | common cis-acting element in promoter and enhancer regions          |
| TATA-box             | ATATAA         | 240834   | core promoter element around -30 of transcription start             |
| TATA-box             | TATA           | 240835   | core promoter element around -30 of transcription start             |
| CAAT-box             | CAAAT          | 240839   | common cis-acting element in promoter and enhancer regions          |
| TATA-box             | ATATAA         | 240852   | core promoter element around -30 of transcription start             |
| TATA-box             | TATA           | 240853   | core promoter element around -30 of transcription start             |
| Box 4                | ATTAAT         | 240895   | part of a conserved DNA module involved in light responsiveness     |
| TATA-box             | TATAAATA       | 240901   | core promoter element around -30 of transcription start             |
| TATA-box             | TATAAAT        | 240902   | core promoter element around -30 of transcription start             |
| TATA-box             | TATAAA         | 240903   | core promoter element around -30 of transcription start             |
| TATA-box             | TATAA          | 240904   | core promoter element around -30 of transcription start             |
| TATA-box             | TATA           | 240905   | core promoter element around -30 of transcription start             |
| CAAT-box             | CAAT           | 240924   | common cis-acting element in promoter and enhancer regions          |
| CAAT-box             | CAAT           | 240928   | common cis-acting element in promoter and enhancer regions          |
| CAAT-box             | CAAAT          | 240954   | common cis-acting element in promoter and enhancer regions          |
| CAAT-box             | CAAAT          | 240962   | common cis-acting element in promoter and enhancer regions          |
| CAAT-box             | CAAT           | 240993   | common cis-acting element in promoter and enhancer regions          |
| TATA-box             | ATATAA         | 241005   | core promoter element around -30 of transcription start             |
| TATA-box             | TATA           | 241006   | core promoter element around -30 of transcription start             |
| CAAT-box             | CAAAT          | 241016   | common cis-acting element in promoter and enhancer regions          |
| Unnamed__4           | CTCC           | 241051   |                                                                     |
| CAAT-box             | CAAAT          | 241071   | common cis-acting element in promoter and enhancer regions          |
| ARE                  | AAACCA         | 241074   | cis-acting regulatory element essential for the anaerobic induction |
| TATA-box             | TATATA         | 241099   | core promoter element around -30 of transcription start             |
| AT~TATA-box          | TATATA         | 241099   |                                                                     |
| TATA-box             | ATATAT         | 241100   | core promoter element around -30 of transcription start             |
| TATA-box             | TATA           | 241101   | core promoter element around -30 of transcription start             |
| GT1-motif            | GGTTAA         | 241110   | light responsive element                                            |
| CAAT-box             | CAAT           | 241135   |                                                                     |
| L-box                | ATCCACCTAC     | 241170   | part of a light responsive element                                  |
| TATA-box             | ATATAA         | 241188   | core promoter element around -30 of transcription start             |
| TATA-box             | TATA           | 241189   | core promoter element around -30 of transcription start             |
| Unnamed__4           | CTCC           | 241229   |                                                                     |
| CAAT-box             | CAAT           | 241241   | common cis-acting element in promoter and enhancer regions          |
| CAAT-box             | CAAT           | 241249   | common cis-acting element in promoter and enhancer regions          |
| CAAT-box             | CAAT           | 241273   | common cis-acting element in promoter and enhancer regions          |

| Element           | Motif sequence | Position | Function                                                         |
|-------------------|----------------|----------|------------------------------------------------------------------|
| TATA-box          | ATTATA         | 241292   | core promoter element around -30 of transcription start          |
| TATA-box          | TATATAA        | 241293   | core promoter element around -30 of transcription start          |
| TATA-box          | TATATA         | 241294   | core promoter element around -30 of transcription start          |
| AT~TATA-box       | TATATA         | 241294   |                                                                  |
| TATA-box          | ATATAT         | 241295   | core promoter element around -30 of transcription start          |
| TATA-box          | TATA           | 241296   | core promoter element around -30 of transcription start          |
| Box 4             | ATTAAT         | 241327   | part of a conserved DNA module involved in light responsiveness  |
| GT1-motif         | GGTTAA         | 241398   | light responsive element                                         |
| MYB-like sequence | TAACCA         | 241399   |                                                                  |
| MYB               | TAACCA         | 241399   |                                                                  |
| CAAT-box          | CAAT           | 241411   | common cis-acting element in promoter and enhancer regions       |
| TC-rich repeats   | GTTTTCTTAC     | 241419   | cis-acting element involved in defense and stress responsiveness |
| TCT-motif         | TCTTAC         | 241423   | part of a light responsive element                               |
| MBS               | CAACTG         | 241434   | MYB binding site involved in drought-inducibility                |
| Myb               | CAACTG         | 241434   |                                                                  |
| AuxRR-core        | GGTCCAT        | 241447   | cis-acting regulatory element involved in auxin responsiveness   |
| CAAT-box          | CCAAT          | 241452   | common cis-acting element in promoter and enhancer regions       |
| CAAT-box          | CAAT           | 241453   | common cis-acting element in promoter and enhancer regions       |
| CAAT-box          | CAAT           | 241457   | common cis-acting element in promoter and enhancer regions       |
| CAAT-box          | CAAT           | 241481   | common cis-acting element in promoter and enhancer regions       |
| CAAT-box          | CAAT           | 241502   | common cis-acting element in promoter and enhancer regions       |
| CAAT-box          | CAAT           | 241538   | common cis-acting element in promoter and enhancer regions       |
